# Supplementary material for: Parental History and Risk of Type 2 Diabetes in Overweight Latino Adolescents
Source: Oxford University Press journal article supplement (doi:10.2337/dc07-0050), 2007-09-28
Supplement: dc070050tablesforonlineappendix.doc [file dc070050tablesforonlineappendix.doc]

Table 2. Fixed and random effects for log insulin sensitivity model

| **Family History Model for Insulin Sensitivity Model** | | | | |
| --- | --- | --- | --- | --- |
|  | Intercept | | Slope over age | |
| SI Intercept | 0.825*** | 7.844E-02 | -2.087E-02* | 2.772E-02 |
| Tanner | 2.018E-03 | 1.239E-02 | 1.042E-02* | 6.200E-03 |
| Gender (Male = REF | -4.322E-02 | 3.508E-02 | 1.068E-03 | 1.505E-02 |
| Gestational Diabetes | 7.150E-02** | 3.421E-02 | -9.680E-04 | 1.541E-02 |
| Total Fat mass | -1.408E-05*** | 1.835E-06 | 6.429E-07 | 8.077E-07 |
| Total Lean Mass | -6.237E-06*** | 2.286E-06 | 3.786E-07 | 9.561E-07 |
| Father | 1.106E-02 | 3.653E-02 | -4.757E-03 | 1.555E-02 |
| Mother | -5.527E-02* | 2.970E-02 | -8.705E-03 | 1.228E-02 |
| Paternal Grandfather | -1.609E-02 | 3.367E-02 | -4.658E-03 | 1.572E-02 |
| Paternal Grandmother | -7.813E-02** | 3.290E-02 | -1.465E-02 | 1.370E-02 |
| Maternal Grandfather | -1.012E-02 | 3.085E-02 | -1.667E-02 | 1.281E-02 |
| Maternal Grandmother | 7.321E-03 | 2.848E-02 | -2.752E-02** | 1.260E-02 |
| Random Effects | 2.444E-02*** | 3.594E-03 | 5.922E-04 | 5.198E-04 |
| *Model Fit versus Covarariate Model* | ***2 = 5.29 (df =12 )*** | | | |
| *Variance accounted for* | ******** | | | |

*p< .10 **p< .05 *** p < .01

Table 3. Fixed and random effects for log acute insulin response

| **Family History Model for Acute Insulin Response Model** | | | | |
| --- | --- | --- | --- | --- |
|  | Intercept | | Slope over age | |
| AIR Intercept | 3.301*** | 7.593E-02 | -6.902E-02*** | 2.511E-03 |
| Tanner | -4.160E-02*** | 1.013E-02 | -7.437E-03 | 4.899E-03 |
| Gender (Male = Ref) | 1.207E-02 | 3.061E-02 | 2.989E-02** | 1.193E-02 |
| Gestational Diabetes | 1.972E-02 | 3.104E-02 | 1.001E-02 | 1.240E-02 |
| Total Fat mass | -2.071E-06 | 1.664E-06 | -9.404E-07 | 7.039E-07 |
| Total Lean Mass | 3.220E-06* | 1.946E-06 | 2.060E-06*** | 7.493E-07 |
| Log Insulin Sensitivity | -0.697*** | 3.783E-02 | 6.821E-02*** | 1.657E-02 |
| Father | 4.753-02 | 3.280E-02 | -8.933E-03 | 1.231E-02 |
| Mother | -3.908E-02* | 2.684E-02 | -1.988E-02** | 9.647E-03 |
| Paternal Grandfather | 7.155E-03 | 3.041E-02 | 9.315E-03 | 1.262E-02 |
| Paternal Grandmother | -1.005E-02 | 2.973E-02 | -7.920E-03 | 1.079E-02 |
| Maternal Grandfather | 5.565-03 | 2.781E-02 | 9.433E-03 | 1.016E-02 |
| Maternal Grandmother | 3.417E-02 | 2.576E-02 | 3.786E-04 | 1.008E-02 |
| Random Effects | 2.356E-02*** | 3.107E-03 | -1.838E-05 | 4.390E-04 |
| *Model Fit versus Covarariate Model* | *2 = 13.98 (df = 12)**** | | | |
| *Variance accounted for* | ** | | | |

*p< .10 **p< .05 *** p < .01

Table 4. Fixed and random effects for log disposition index model

| **Family History Model for Disposition Index Model** | | | | |
| --- | --- | --- | --- | --- |
|  | Intercept | | Slope over age | |
| DI Intercept | 3.570*** | 7.063E-02 | -2.544E-02* | 2.402E-02 |
| Tanner | -4.176E-02*** | 1.13E-02 | -3.803E-03 | 5.446E-03 |
| Gender (Male = Ref) | -3.987E-03 | 3.150E-02 | 2.965E-02** | 1.294E-02 |
| Gestational Diabetes | 3.752E-02 | 3.084E-02 | -1.450E-02 | 1.325E-02 |
| Total Fat Mass | -5.948.E-06*** | 1.652E-06 | -1.765E-06** | 6.985E-07 |
| Total Lean Mass | 7.423E-07 | 2.060E-06 | 1.959E-06** | 8.370E-07 |
| Father | 5.184E-02 | 3.274E-02 | -6.261E-03 | 1.320E-02 |
| Mother | -4.947E-02* | 2.672E-02 | -2.110E-02** | 1.045E-02 |
| Paternal Grandfather | -5.702E-02 | 3.028E-02 | -3.247E-03 | 1.343E-02 |
| Paternal Grandmother | -2.929E-02 | 2.954E-02 | -9.067E-03 | 1.160E-02 |
| Maternal Grandfather | -1.044E-04 | 2.767E-02 | 3.586E-03 | 1.087E-02 |
| Maternal Grandmother | 3.286E-02 | 2.561E-02 | -5.971E-03 | 1.076E-02 |
| Random Effects | 2.058E-02 | 3.062E-03 | -2.104E-05 | 6.009E-04 |
| ***Model Fit versus Covarariate Model*** | ***2 = 13.63 (df =12 )****** | | | |
| ***Variance accounted for*** | ** | | | |

*p< .10 **p< .05 *** p < .01

Table 5. Fixed and random effects for log fasting glucose model

| **Family History Model for Fasting Glucose** | | | | |
| --- | --- | --- | --- | --- |
|  | Intercept | | Slope over age | |
| Fasting GlucoseIntercept | 1.962*** | 9.573E-03 | 2.342E-03 | 3.177E-03 |
| Tanner | 1.627E-03 | 1.570E-03 | 7.616E-04 | 7.197E-04 |
| Gender (Male = Ref) | -1.0909E-02*** | 4.215E-03 | -5.661E-03*** | 1.747E-03 |
| Gestational Diabetes | -1.216E-03 | 4.180E-03 | -1.438E-03 | 1.717E-03 |
| Total Fat Mass | 1.751E-07 | 2.305E-05 | 2.982E-07*** | 9.279E-08 |
| Total Lean Mass | -1.974E-08 | 2.753E-07 | -1.990E-07* | 1.080E-07 |
| Father | -3.469E-03 | 4.48E-03 | 1.330E-03 | 1.786E-03 |
| Mother | 1.534E-03 | 3.607E-03 | 2.794E-03*** | 1.380E-03 |
| Paternal Grandfather | -2.170E-03 | 4.145E-03 | -9.248E-04 | 1.785E-03 |
| Paternal Grandmother | 5.811E-03 | 4.051E-03 | 1.259E-03 | 1.561E-03 |
| Maternal Grandfather | 1.616E-03 | 3.808E-03 | -1.785E-03 | 1.476E-03 |
| Maternal Grandmother | 5.522E-04 | 3.496E-03 | -1.260E-03 | 1.386E--03 |
| **Random Effects** | 3.627E-02*** | 5.839E-05 | 2.710E-06 | 8.668E-06 |
| ***Model Fit versus Covarariate Model*** | ***2 = 9.9 (df =12 )****** | | | |
| ***Variance accounted for*** | ** | | | |

*p< .10 **p< .05 *** p < .01

Table 6. Fixed and random effects for log 2hr- glucose model

| **Family History Model for 2-Hour Glucose** | | | | |
| --- | --- | --- | --- | --- |
|  | Intercept | | Slope over age | |
| 2-hr GlucoseIntercept | 2.090*** | 2.049E-02 | -1.259E-03 | 7.573E-03 |
| Tanner | 7.213E-04 | 3.593E-03 | 1.250E-03 | 1.726E-03 |
| Gender (Male = Ref) | -3.331E-03 | 9.129E-03 | -5.347E-03 | 4.163E-03 |
| Gestational Diabetes | -3.607E-03 | 8.654E-03 | -6.602E-03 | 4.118E-03 |
| Total Fat Mass | 6.958E-07 | 5.053E-07 | 4.135E-07* | 2.223E-07 |
| Total Lean Mass | -3.844E-07 | 6.120E-07 | -3.219E-07 | 2.590E-07 |
| Father | -4.094E-03 | 9.292E-03 | -4.284E-03 | 4.273E-03 |
| Mother | 2.552E-03 | 7.501E-03 | -1.697E-04 | 3.343E-03 |
| Paternal Grandfather | -1.863E-03 | 8.633E-03 | 4.396E-03 | 4.248E-03 |
| Paternal Grandmother | 1.059E-02 | 8.476E-03 | 2.585E-03 | 3.738E-03 |
| Maternal Grandfather | -2.615E-04 | 7.924E-03 | 7.754E-03** | 3.542E-03 |
| Maternal Grandmother | -2.498E-03 | 7.259E--03 | -1.822E-03 | 3.331E-03 |
| Random Effects | 1.203E-03 | 2.601E-04 | 7.209E-05 | 5.297E-05 |
| *Model Fit versus Covarariate Model* | ***2 = 8.4 (df =12 )****** | | | |
| *Variance accounted for* | ** | | | |

*p< .10 **p< .05 *** p < .01
